# Supplementary material for: Nucleophilic vinylic substitution in bicyclic methyleneaziridines: SNVπ or SNVσ?
Source: Royal Society of Chemistry journal article supplement (doi:10.1039/d1nj01458g), 2021-01-01

## Supporting Information

### Nucleophilic vinylic substitution in bicyclic methyleneaziridines: $S_NV_\pi$ or $S_NV_\sigma$ ?

*Vitalii Palchykov,<sup>a</sup> Peter C. Dale,<sup>b</sup> Jeremy Robertson<sup>\*b</sup>*

<sup>a</sup>Research Institute of Chemistry and Geology, Oles Honchar Dnipro National University, 72 Gagarina Avenue,  
Dnipro 49010, Ukraine.

<sup>b</sup>Department of Chemistry, University of Oxford, Chemistry Research Laboratory, Mansfield Road, Oxford OX1 3TA, U.K.

\* Corresponding author e-mail: [jeremy.robertson@chem.ox.ac.uk](mailto:jeremy.robertson@chem.ox.ac.uk)

#### Contents

|                                                             |         |
|-------------------------------------------------------------|---------|
| Conformational energy profile for compound <b>4</b>         | S2      |
| Copies of <sup>1</sup> H and <sup>13</sup> C NMR data       | S3–S11  |
| NOE data for compounds <b>4</b> , <b>11</b> , and <b>12</b> | S12–S14 |

## Energy profile for conformations obtained by rotating the C-*i*-Pr bond in methyleneaziridine 4

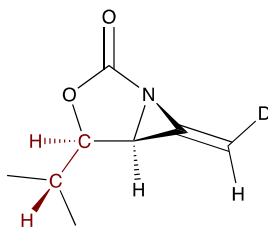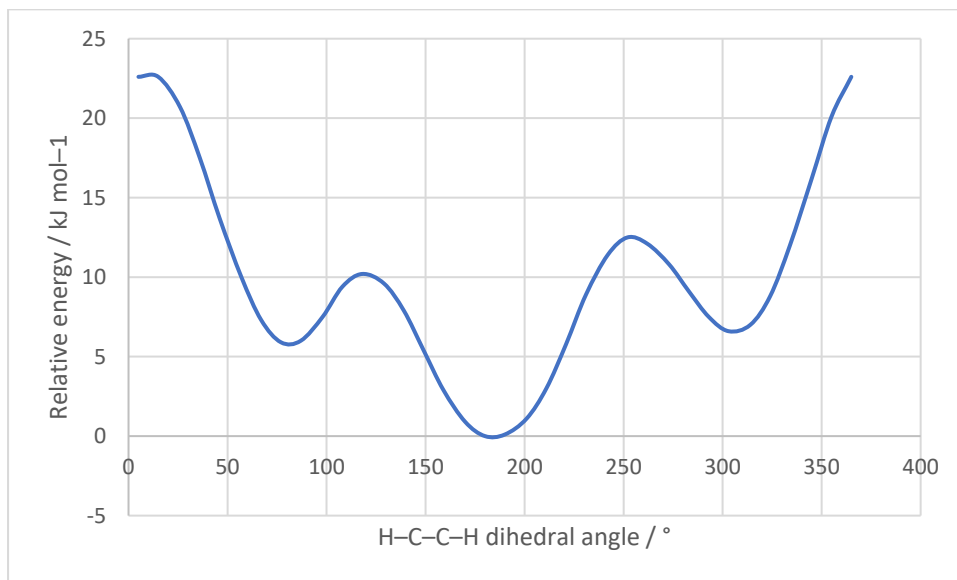

(7)  $^1\text{H}$  NMR (400 MHz,  $\text{CDCl}_3$ ) [volatile sample; contains a little  $\text{PhCO}_2\text{Me}$  and solvent]

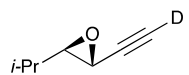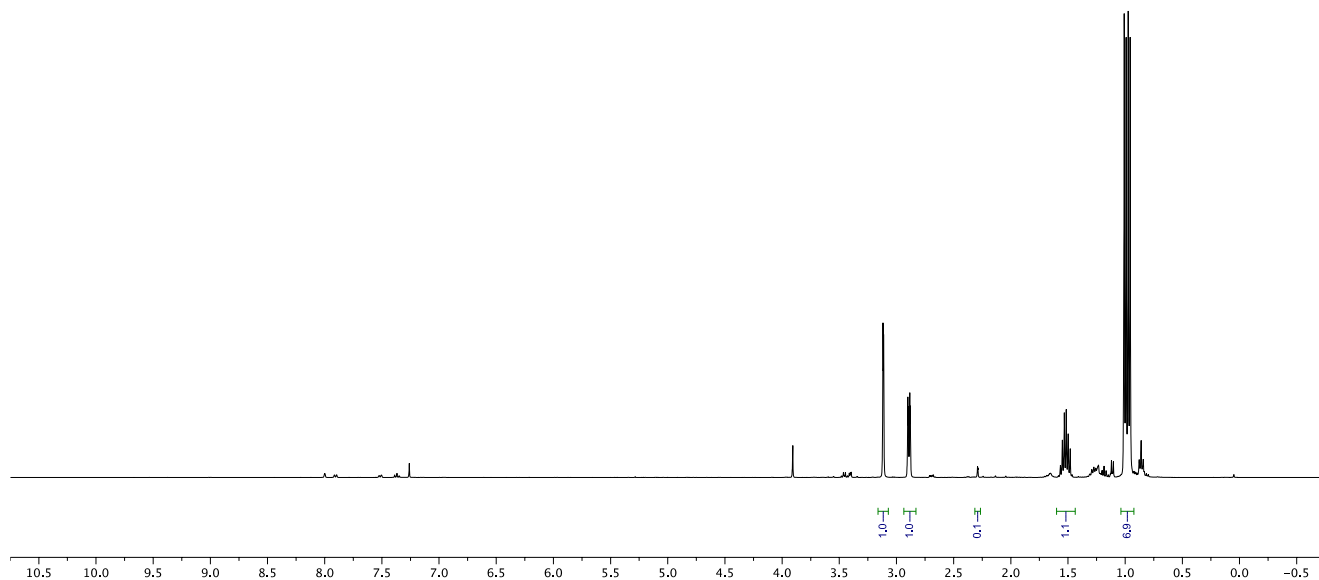

(7)  $^{13}\text{C}$  NMR (100 MHz,  $\text{CDCl}_3$ )

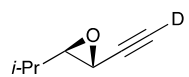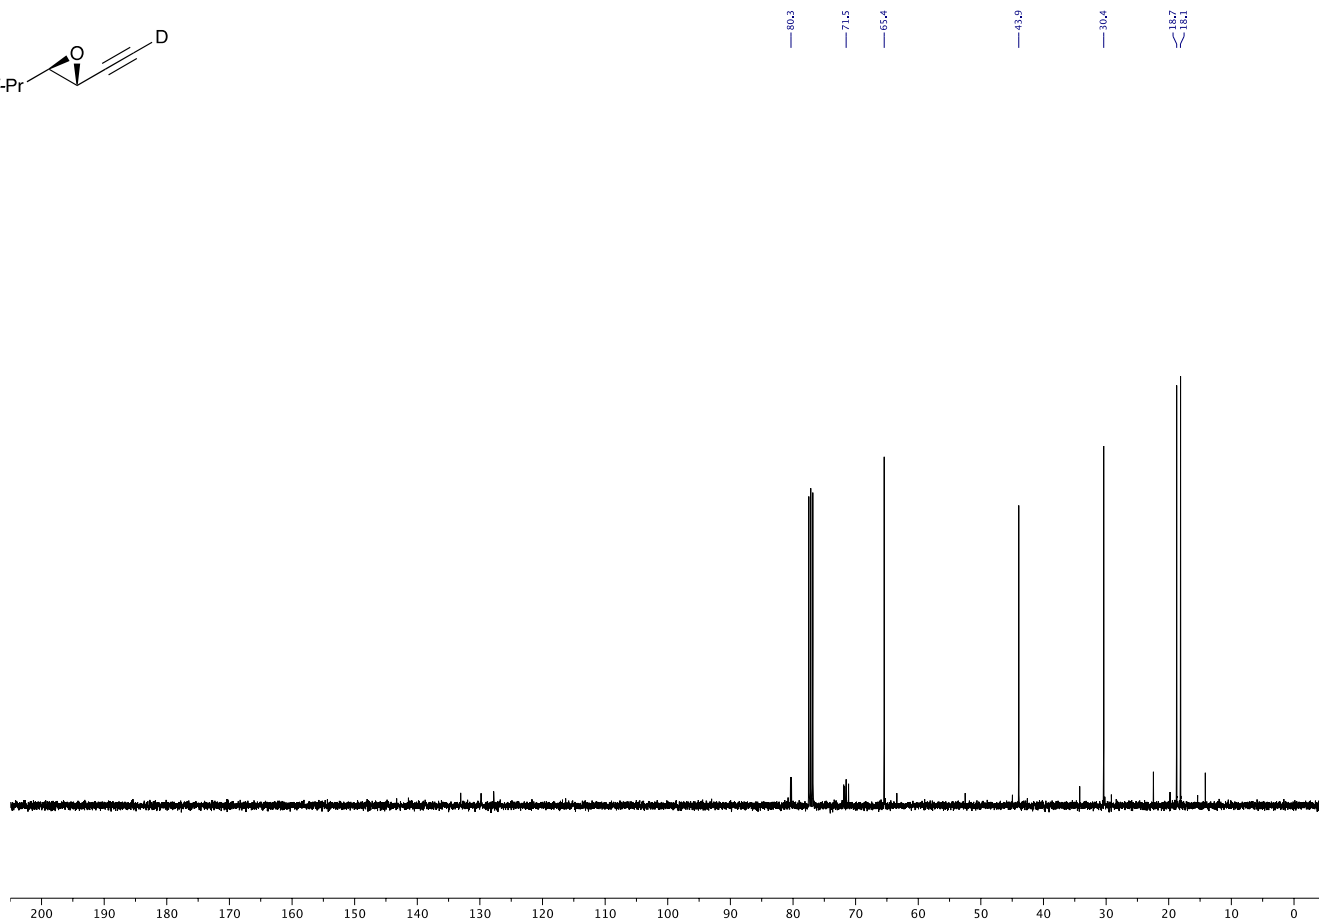

(8)  $^1\text{H}$  NMR (500 MHz,  $\text{CDCl}_3$ )

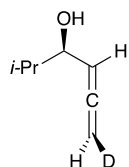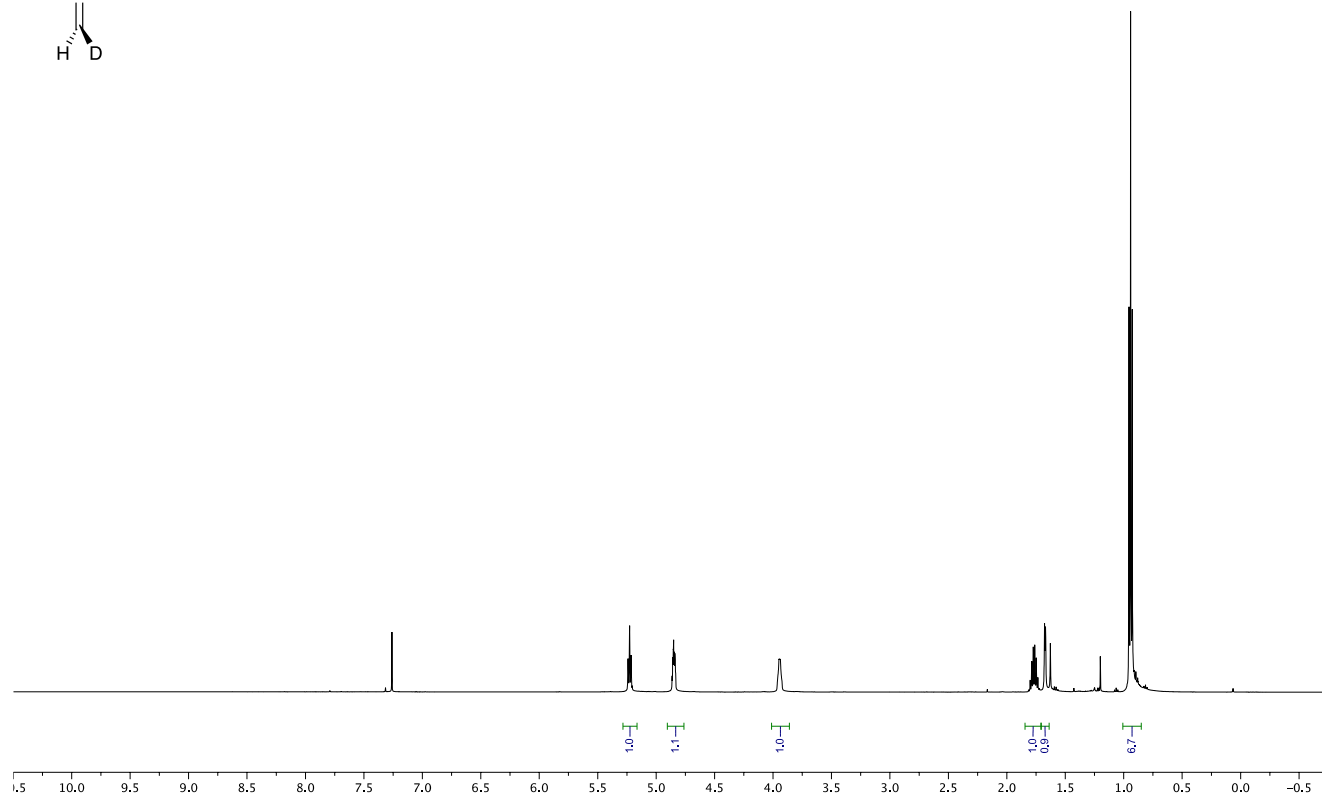

(8)  $^{13}\text{C}$  NMR (125 MHz,  $\text{CDCl}_3$ )

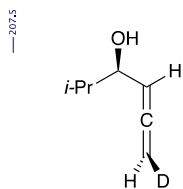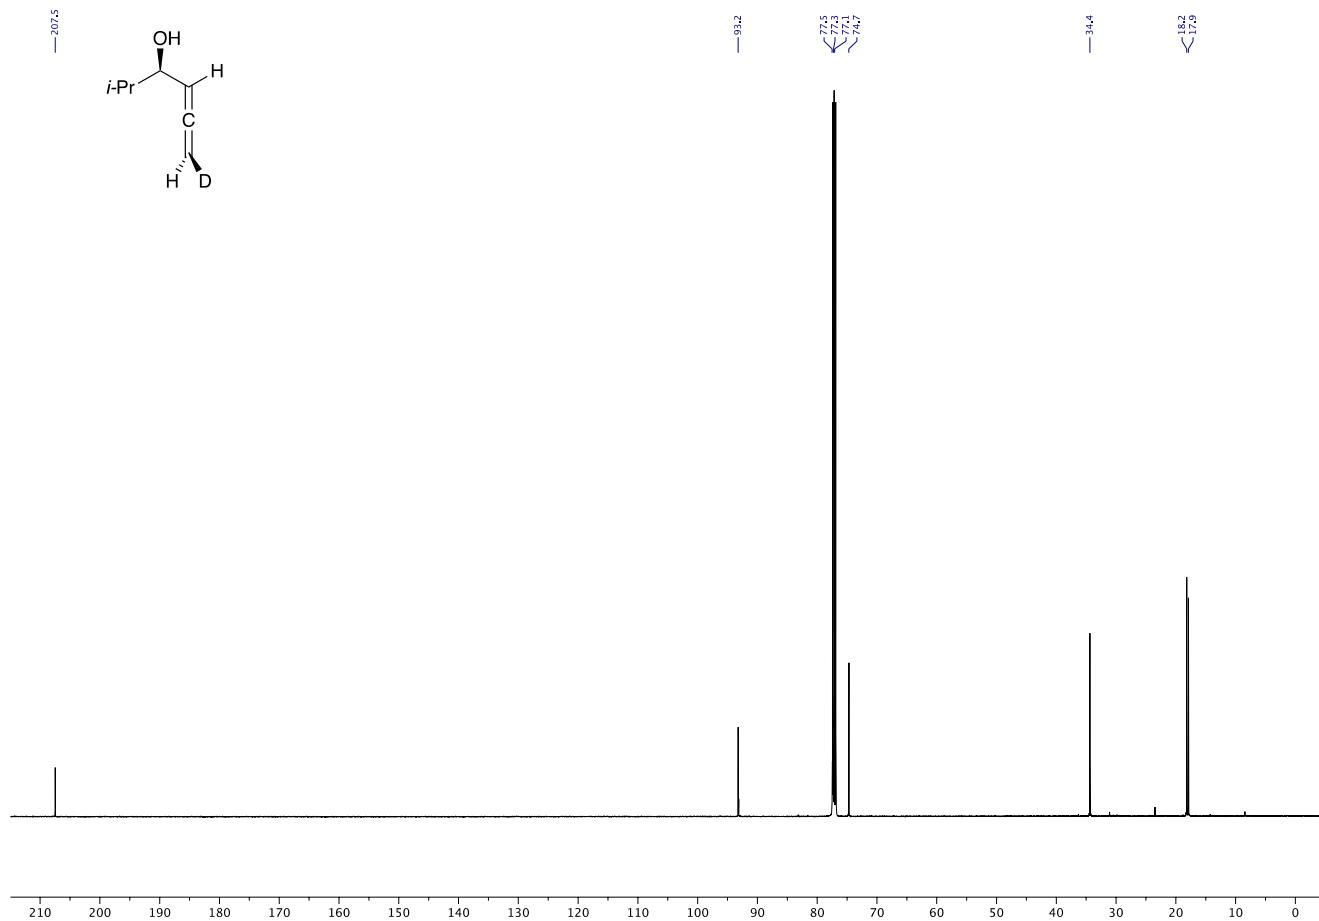

(S1)  $^1\text{H}$  NMR (500 MHz,  $\text{CDCl}_3$ )

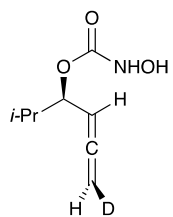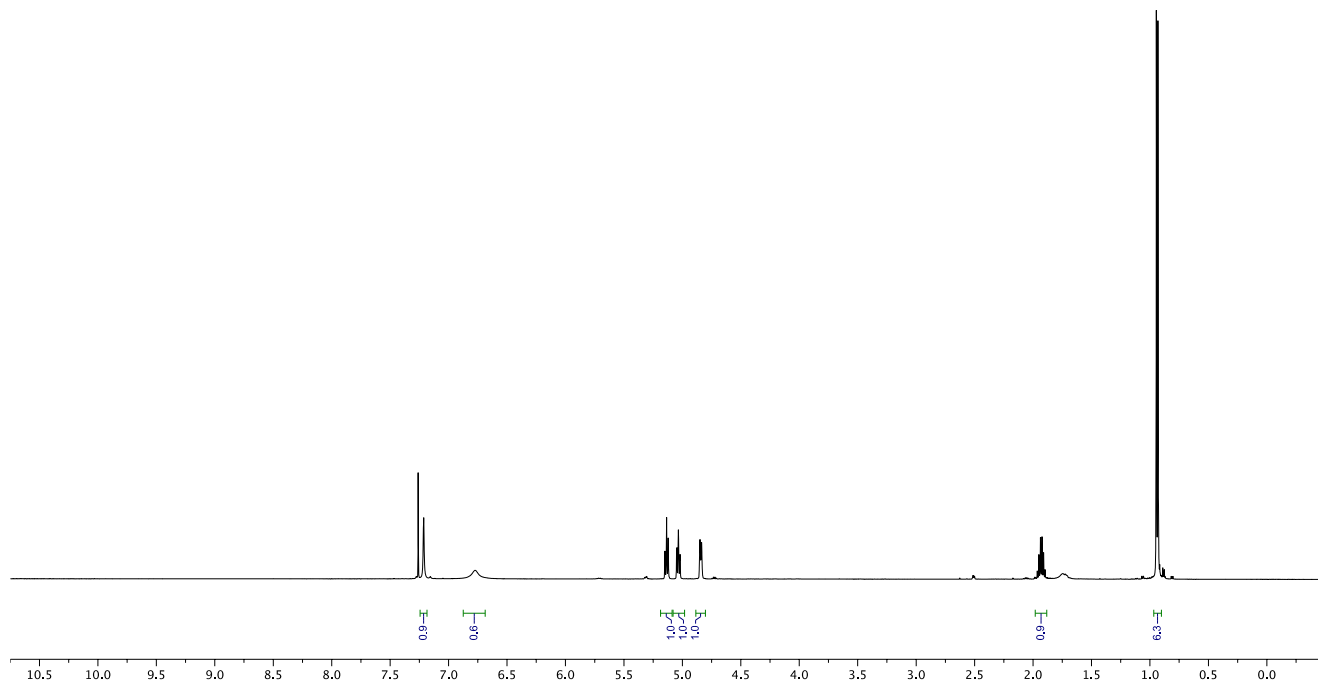

(S1)  $^{13}\text{C}$  NMR (125 MHz,  $\text{CDCl}_3$ )

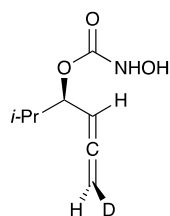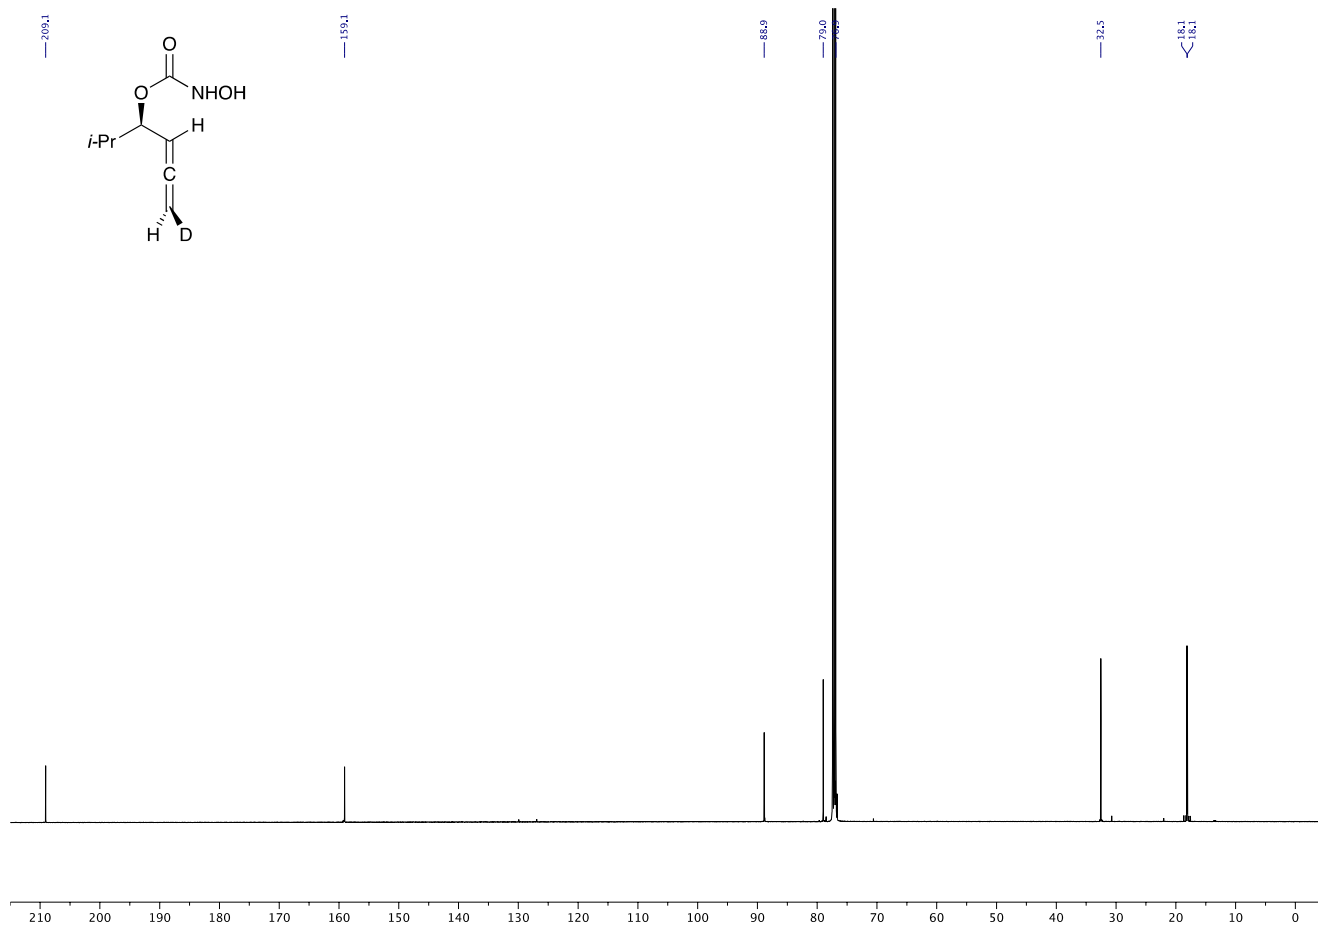

(9)  $^1\text{H}$  NMR (400 MHz,  $\text{CDCl}_3$ )

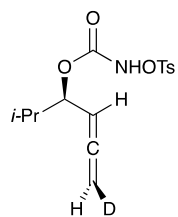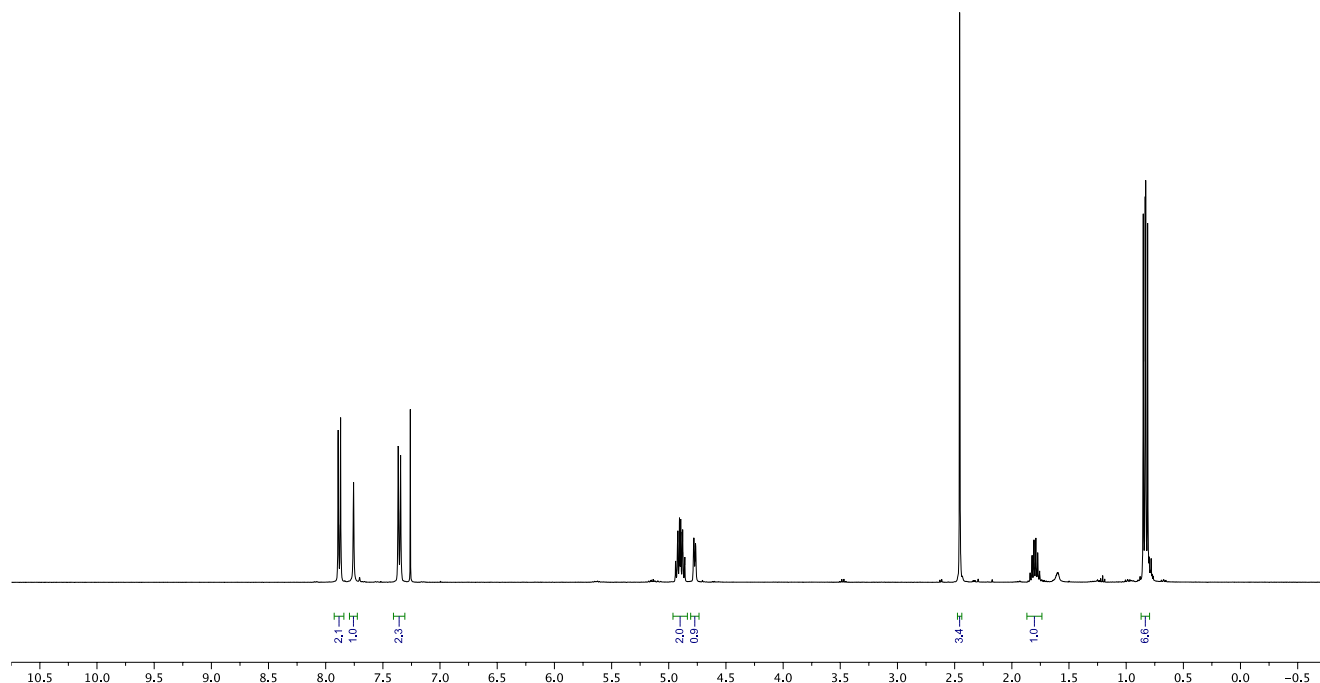

(9)  $^{13}\text{C}$  NMR (100 MHz,  $\text{CDCl}_3$ )

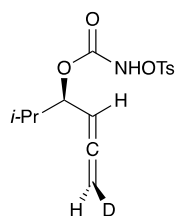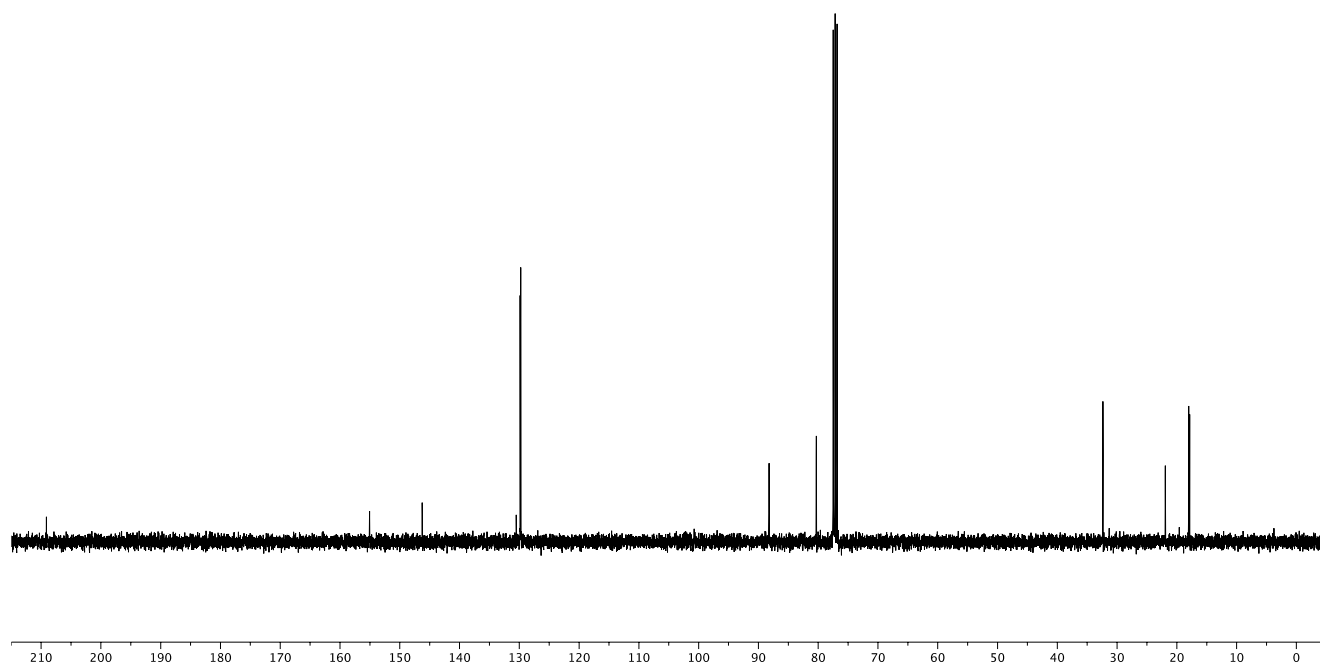

(4)  $^1\text{H}$  NMR (500 MHz,  $\text{CDCl}_3$ )

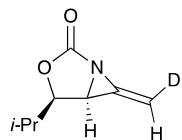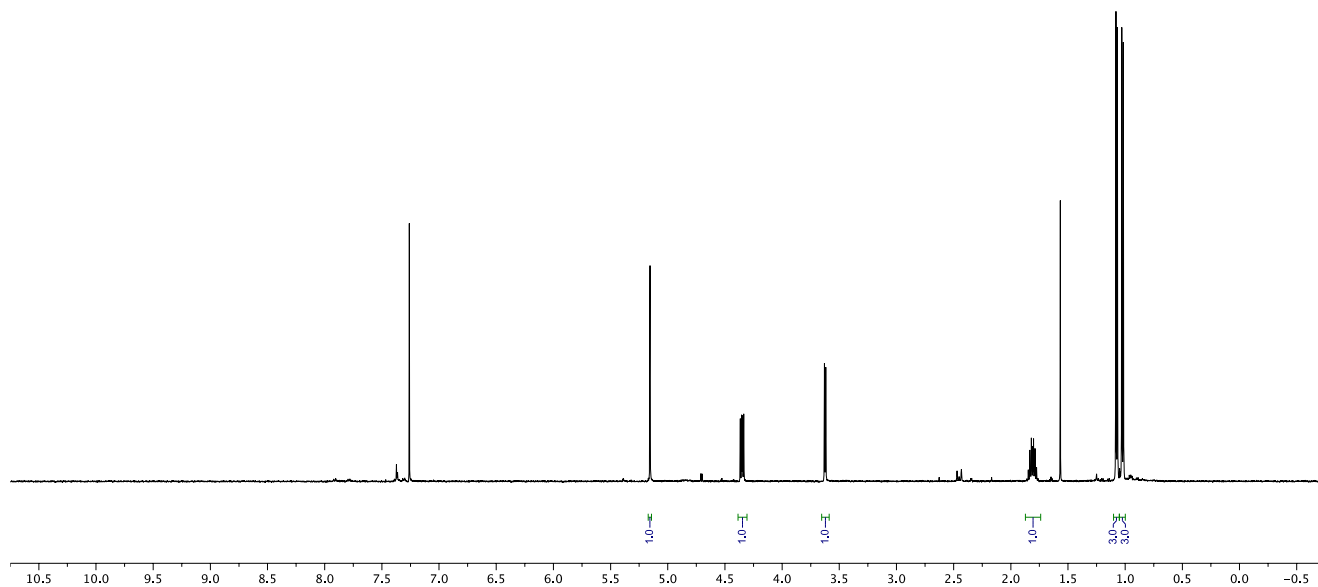

(4)  $^{13}\text{C}$  NMR (100 MHz,  $\text{CDCl}_3$ )

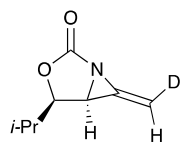

162.9, 130.3, 91.3, 83.8, 43.7, 32.2, 19.8, 17.6

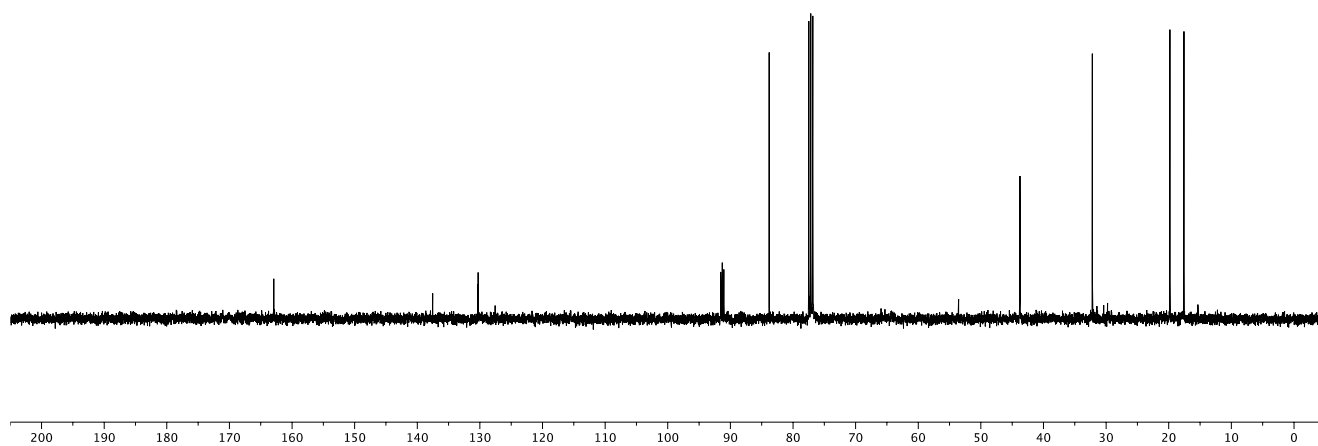

(11)  $^1\text{H}$  NMR (500 MHz,  $\text{CDCl}_3$ )

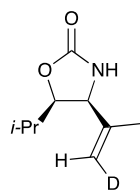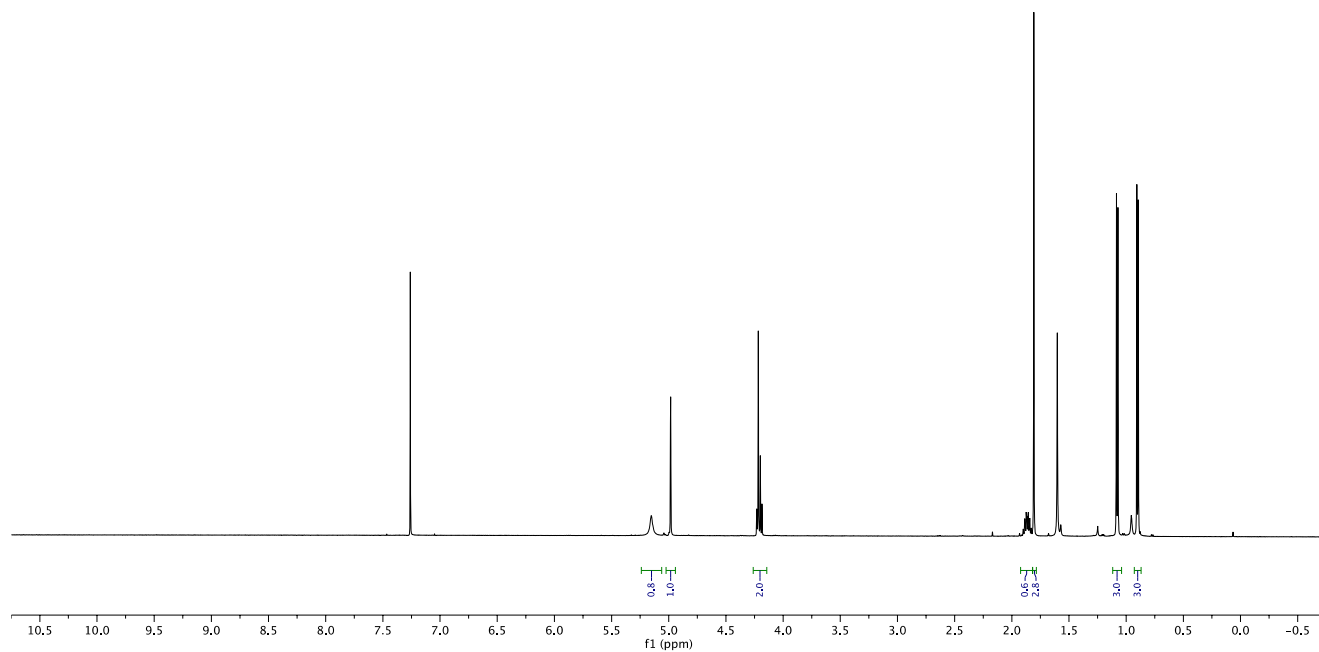

(11)  $^{13}\text{C}$  NMR (125 MHz,  $\text{CDCl}_3$ )

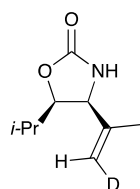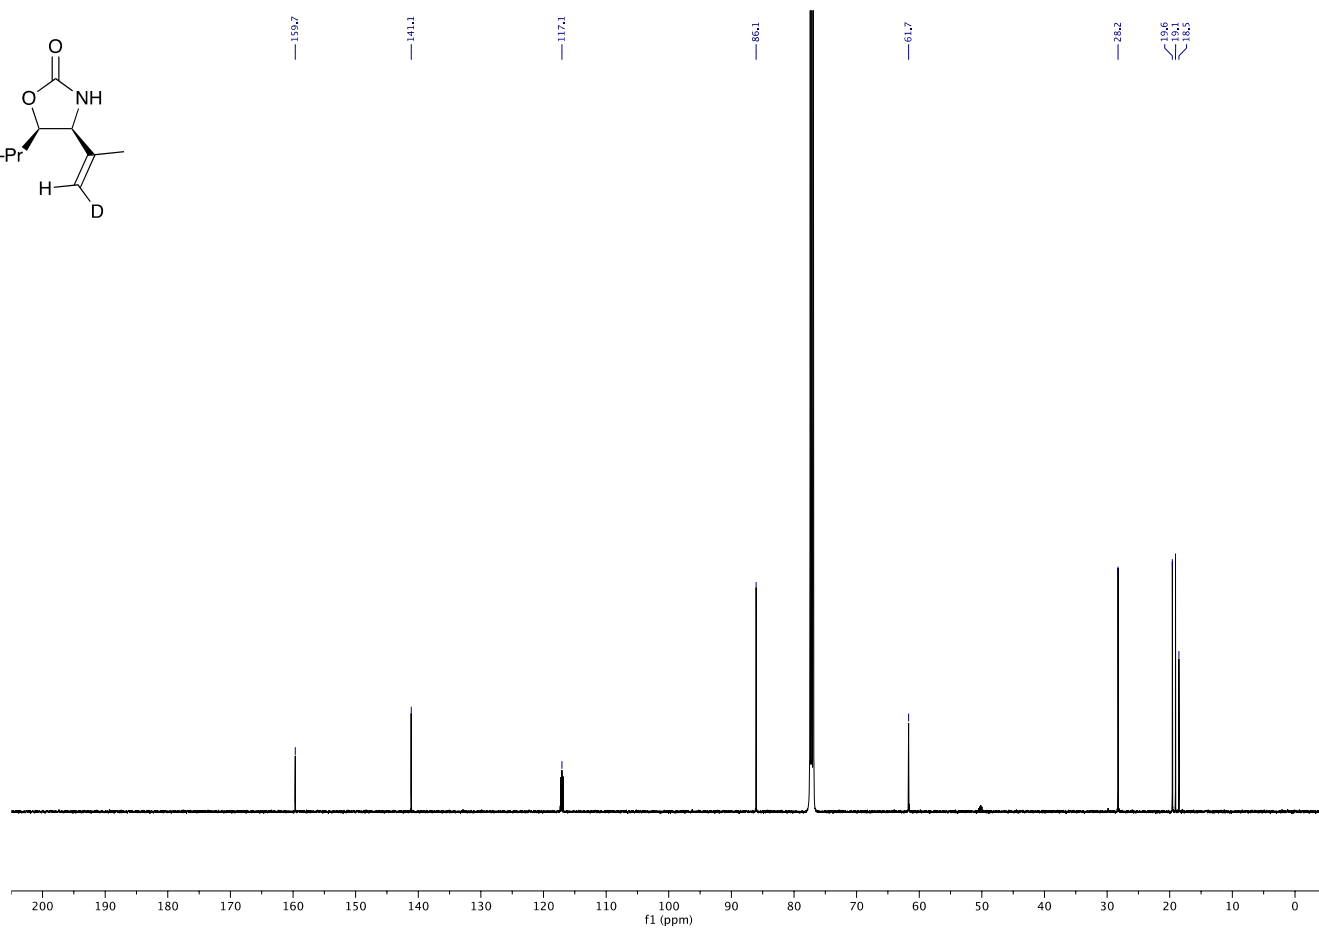



(12)

$^1\text{H}$  NMR (500 MHz,  $\text{CDCl}_3$ )

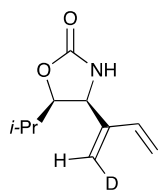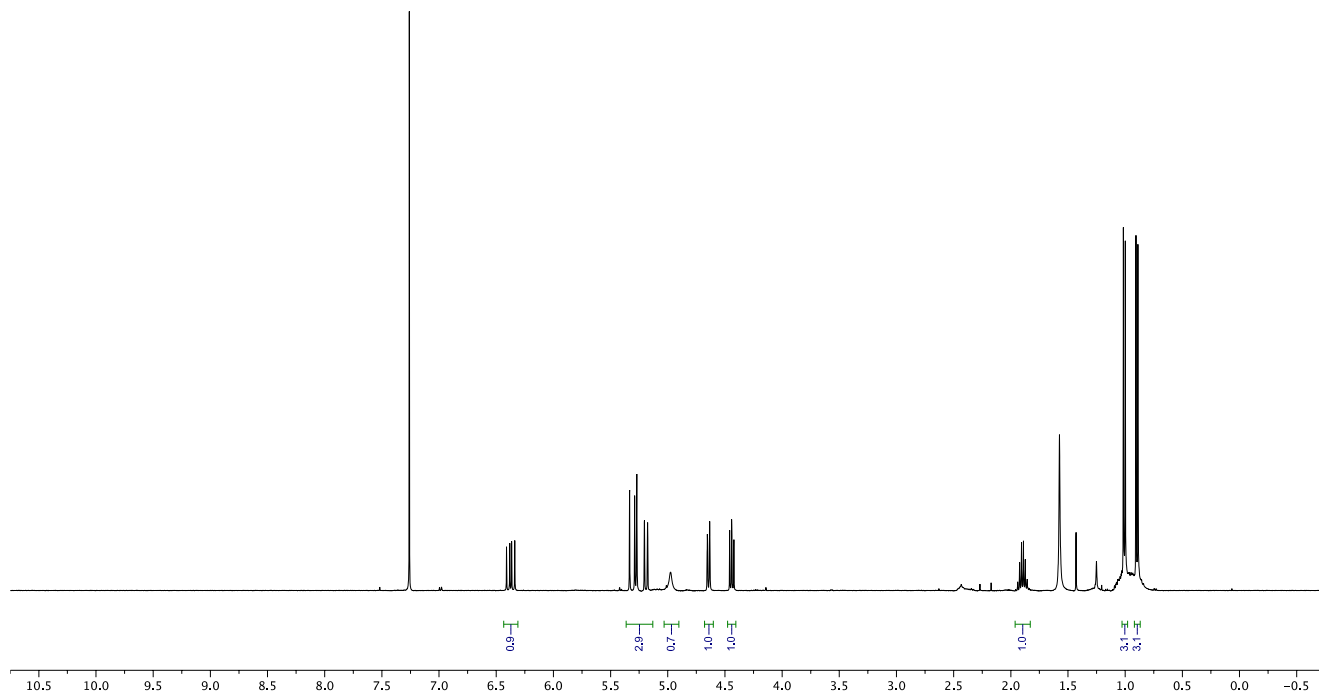

(12)  $^1\text{H}$  NMR (500 MHz, acetone- $d_6$ )

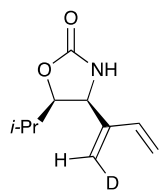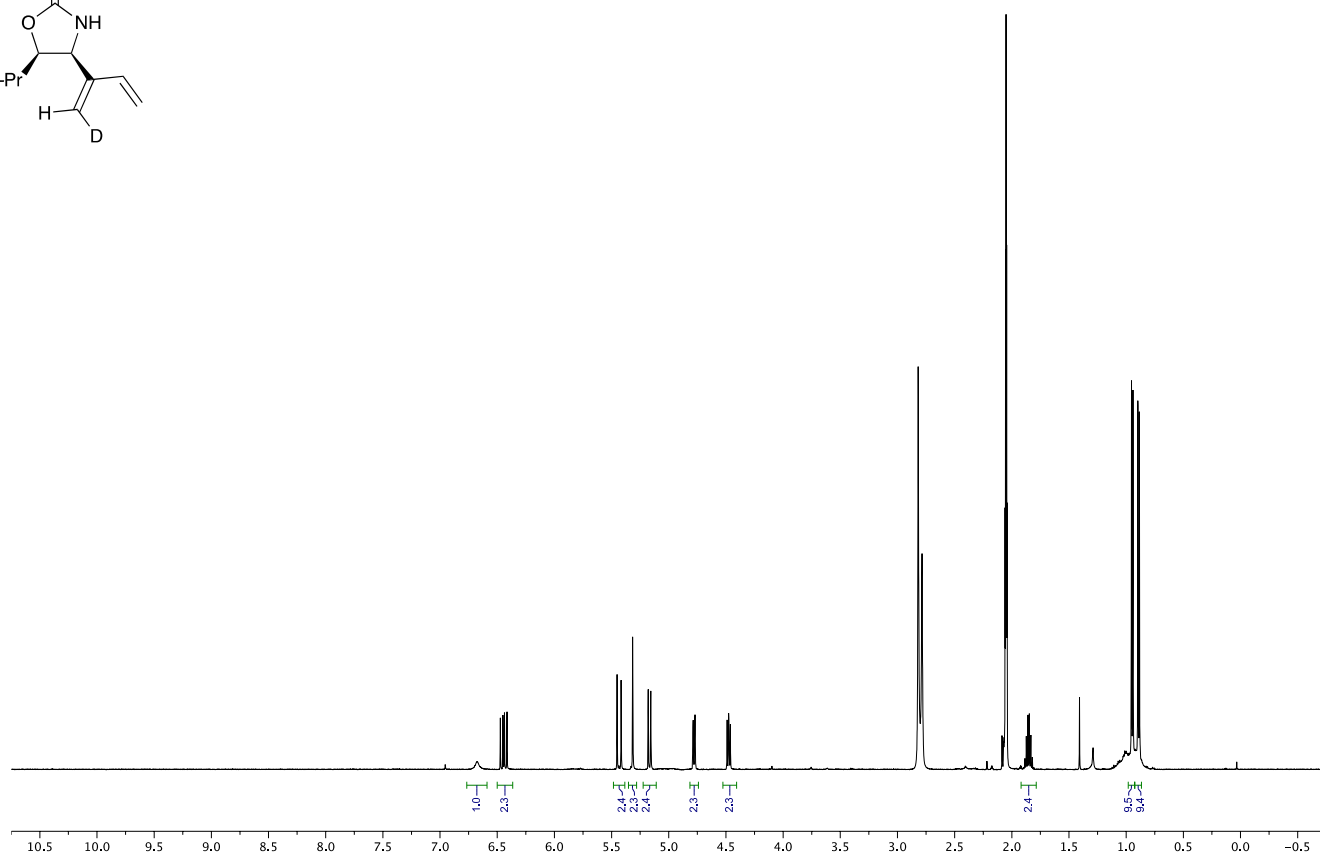

(12)  $^{13}\text{C}$  NMR (125 MHz, acetone- $d_6$ )

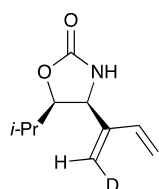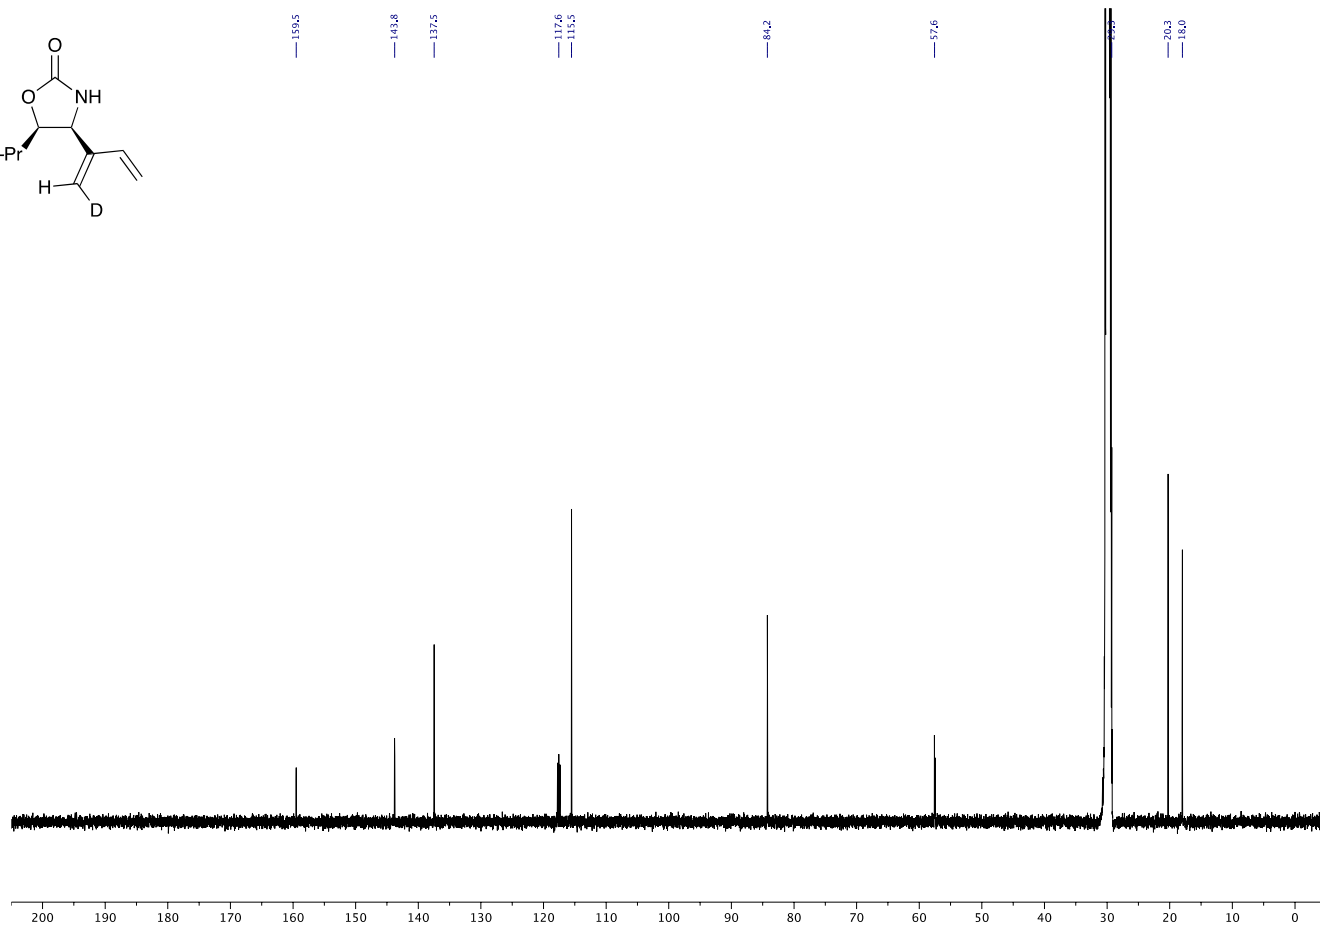

(13)  $^1\text{H}$  NMR (500 MHz,  $\text{CDCl}_3$ )

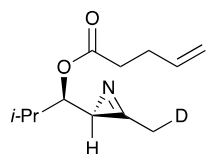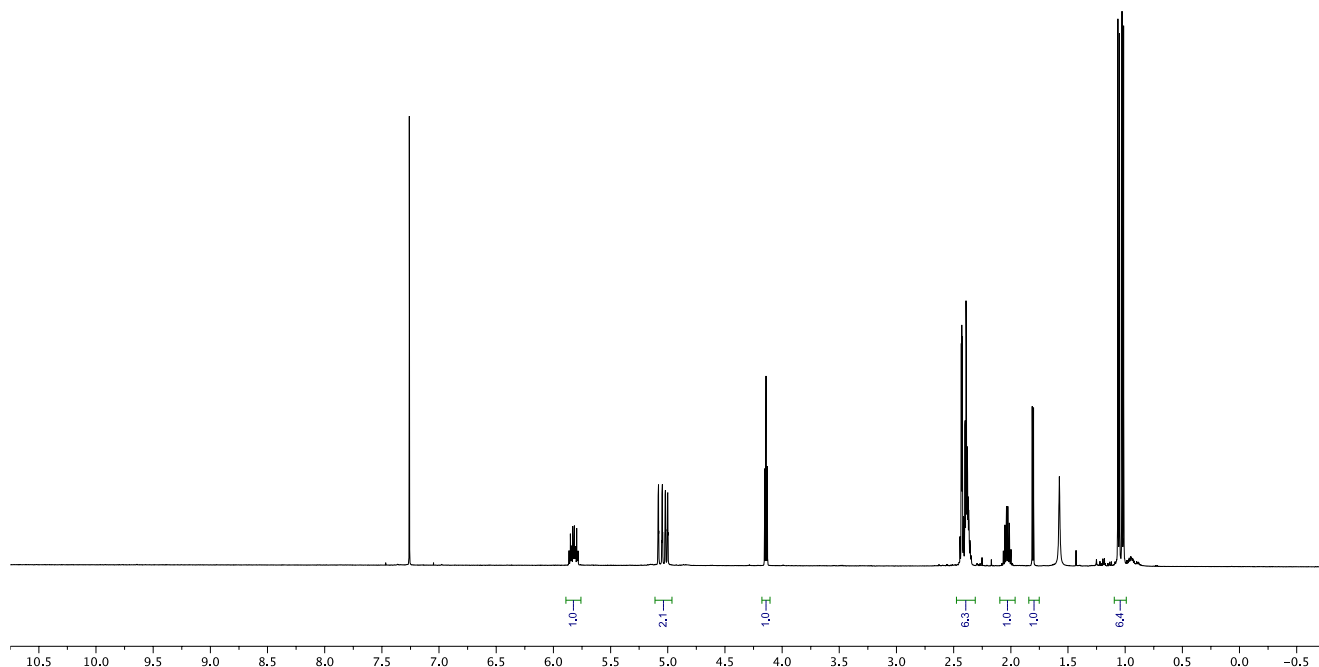

(S1)  $^{13}\text{C}$  NMR (125 MHz,  $\text{CDCl}_3$ )

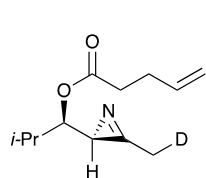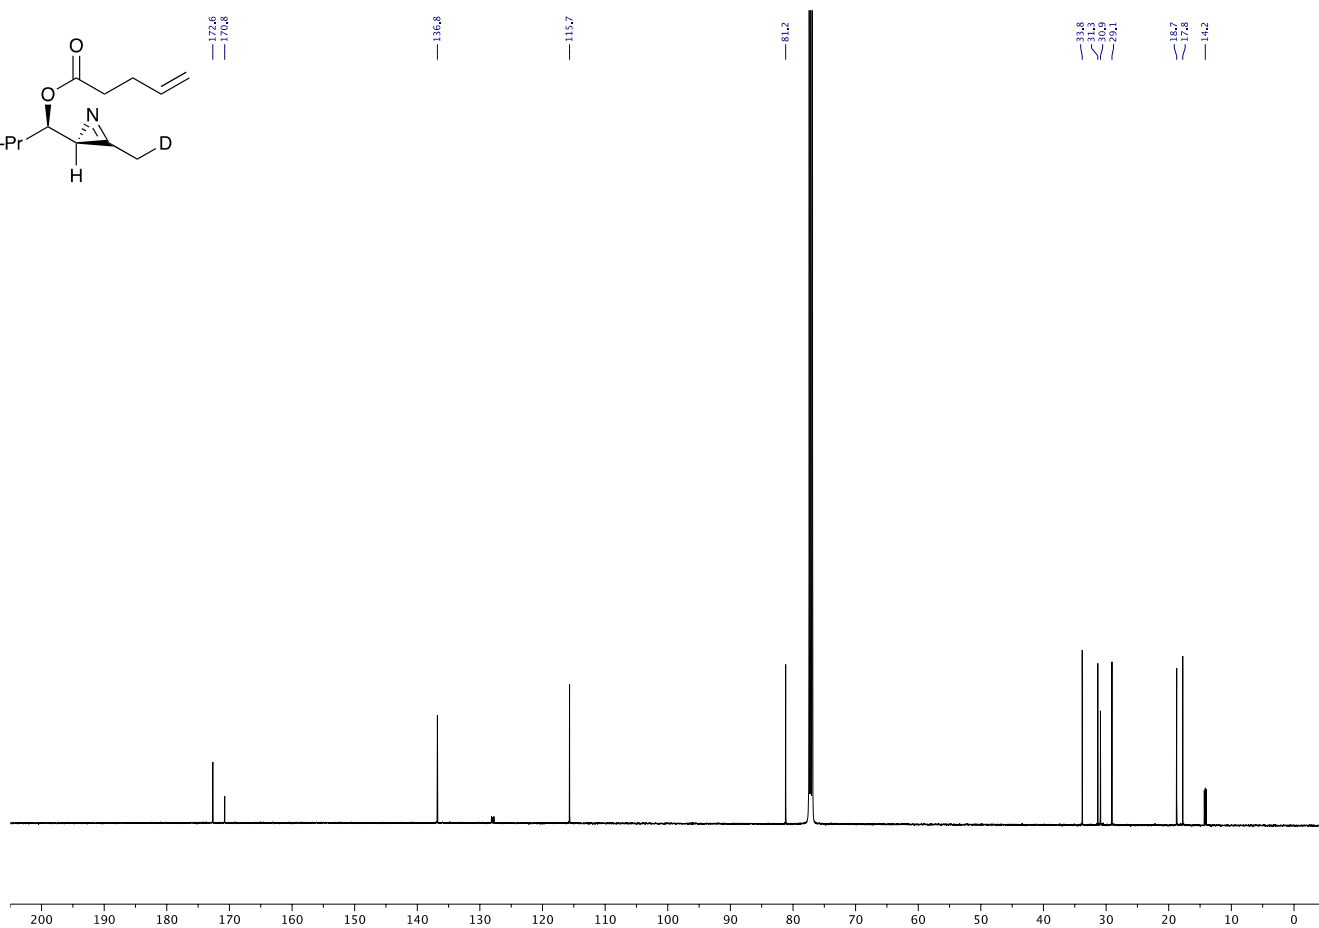

## NOE experiments for compound 4

Top trace: full spectrum\*

Lower traces: NOE experiment with irradiation of:

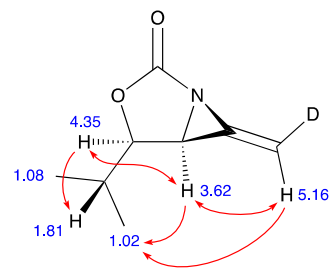

- (a) =CHD resonance at  $\delta$  5.16 (1H, s) • weak correlations with CHN and *i*-Pr support its *trans*-disposition with respect to the alkene–N bond;
- (b) =CHO resonance at  $\delta$  4.35 (1H, dd) • expected correlations to CHN and *i*-Pr only;
- (c) CHN resonance at  $\delta$  3.62 (1H, d) • in addition to the expected CHO correlation, weak correlation to =CHD is consistent with observation (a); correlation to one only of the *i*-Pr methyls (*cf.* (a)).

(\* first irradiated region in this spectrum deleted to maintain the correspondence of peaks in the stack)

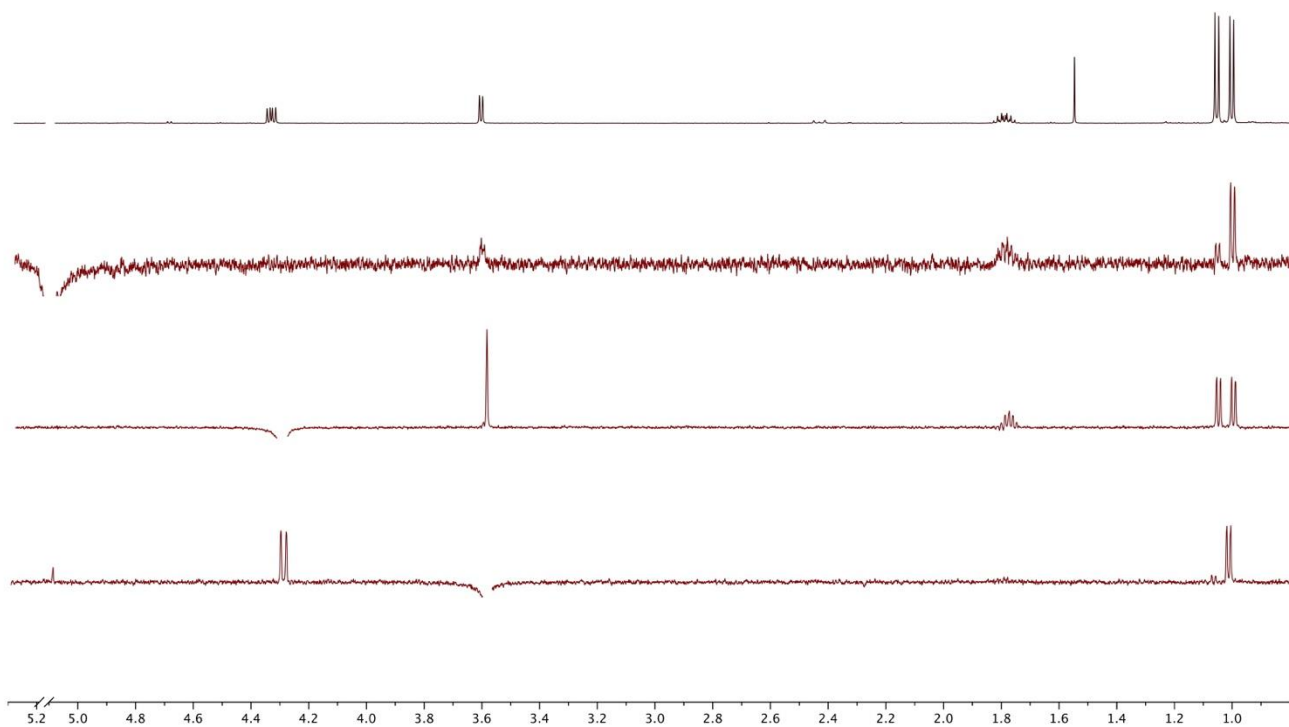

## NOE experiment for compound 11

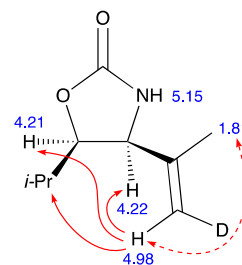

Upper trace: full spectrum\*

Lower trace: NOE experiment with irradiation of =CHD resonance at  $\delta$  4.98 (1H, s)

(\*irradiated region in this spectrum deleted to maintain the correspondence of peaks in the stack)

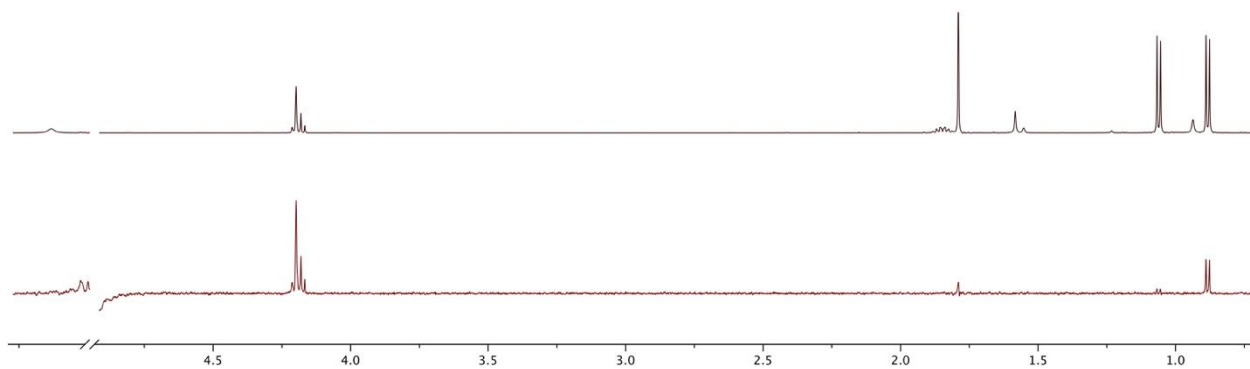

- Strong correlations to the CHNH and CHO protons at 4.18–4.24 (2H, m) and one of the *i*-Pr methyls at 0.90 (3H, d) support a *cis*- disposition of the =CHD proton and the heterocycle; a very weak correlation to the vinyl methyl resonance at 1.81 ppm supports their *trans*- disposition across the alkene double bond.

## NOE experiments for compound 12

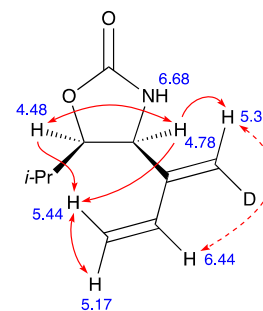

Top trace: full spectrum

Lower traces: NOE experiment with irradiation of:

- (a) =CHZHE resonance at δ 5.44 (1H, d) • no correlation with =CHD consistent with D and vinyl group *cis*-disposed;
- (b) =CHD resonance at δ 5.32 (1H, s) • no significant correlations;
- (c) =CHZHE resonance at δ 5.17 (1H, d) • correlation only to its *geminal* methylene proton;
- (d) CHN resonance at δ 4.78 (1H, d) • in addition to the expected CHO correlation, weak correlations to =CHZHE and =CHD support their overall *cis*-relationship to the heterocycle;
- (e) CHO resonance at δ 4.48 (1H, dd) • in addition to the expected CHN correlation, a weak correlation to =CHZHE supports the observation in (d).

(\* first irradiated region in this spectrum deleted to maintain the correspondence of peaks in the stack)

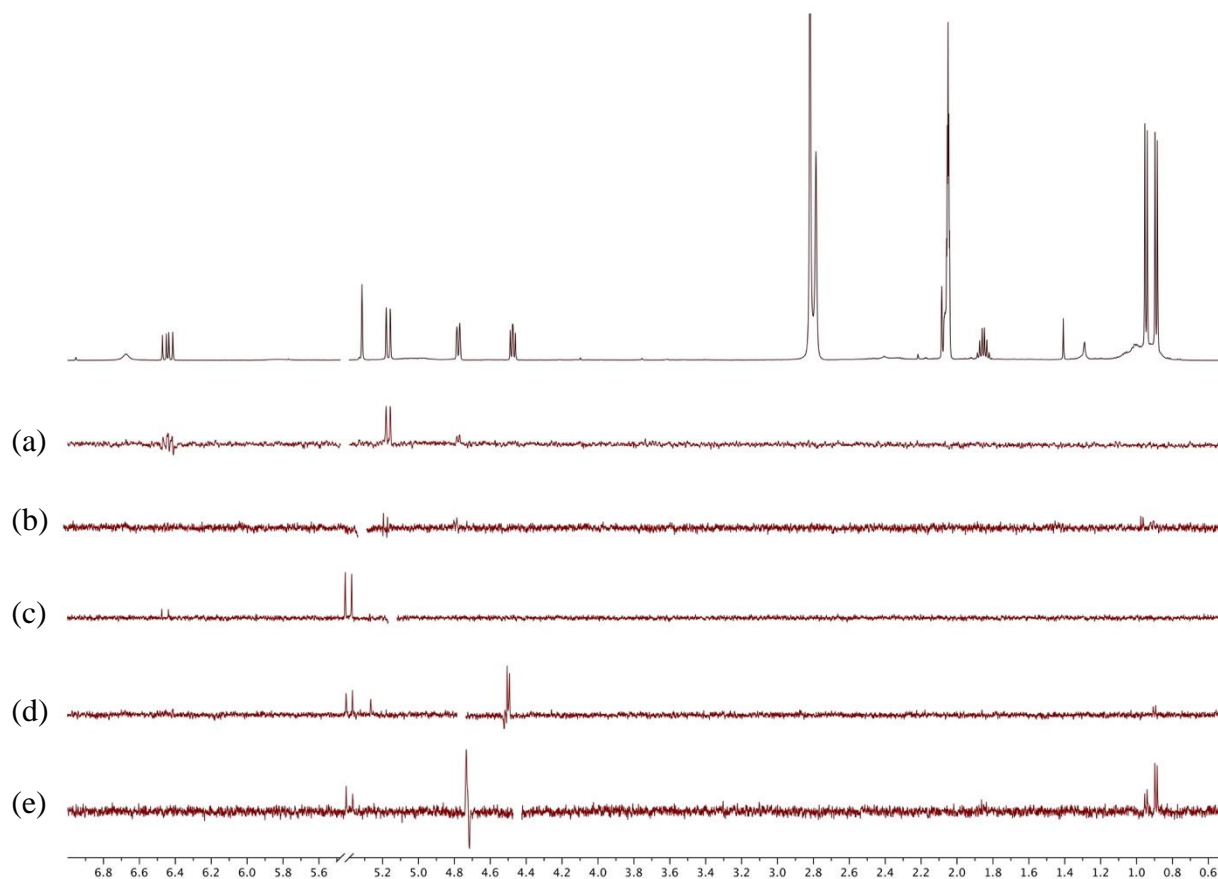

Supplement: d1nj01458g1.pdf [file d1nj01458g1.pdf]
